# Supplementary material
Source: publisher figshare collection journal article supplement (https://gsapubs.figshare.com/ndownloader/files/31650587)
Supplement: Supplementary file 1 [file 31650587]

## Sheet: TABLE S1
		TABLE S1. ZIRCON (U-Th)/He DATA
Region	Geologic Unit	Sample Name	River Mile	Grain size (μg, equiv. sphere rad.)	U (ng)	Analyt. ± (1σ)	U (ppm) Morphology	Th (ng)	Analyt. ± (1σ)	Th (ppm) Morphology	4He (pmol)	Analyt. ± (1σ)	Ft	Corr. Age (Ma)	Analyt. ± (1σ)
Eastern	Rama Schist	K12-79.6-AW-1	79.6	43.8233	0.928889	0.00960675	266.589	0.294071	0.00406216	84.3979	0.741973	0.00323274	0.727221	187.424	1.96602
		K12-79.6-AW-3	79.6	30.0067	0.335448	0.00356351	284.361	0.191665	0.0897027	162.475	0.285099	0.00320293	0.615083	223.295	12.2968
		K12-79.6-AW-6	79.6	37.4369	0.752956	0.00839191	308.327	0.326735	0.0576187	133.794	1.04806	0.0106175	0.686989	334.265	7.23095
		K12-79.6-AW-8	79.6	44.5286	1.42152	0.0145716	362.869	0.454686	0.149141	116.067	2.34028	0.0152028	0.734532	377.297	9.68132
		K12-79.6-AW-9	79.6	51.0804	0.779868	0.00999314	126.133	0.19484	0.113895	31.5128	0.322039	0.00255604	0.762202	94.3677	3.27901
		K12-79.6-AW-11	79.6	41.6754	1.09907	0.0108901	341.001	0.338019	0.00438703	104.875	0.684677	0.00206449	0.713773	149.619	1.43545
		K12-796-AW-12	79.6	53.9508	1.95706	0.0182468	283.07	0.230976	0.0295538	33.4084	1.86334	0.00781908	0.77688	217.956	2.283
	Zoroaster Granite	K12-85.3L-AW_1	85.3	41.8429	3.95316	0.0371171	1252.32	0.406866	0.0484689	128.89	0.0511467	0.000567105	0.713883	3.28493	0.0474435
		K12-85.3L-AW_4	85.3	48.6587	2.95483	0.0274441	629.78	0.265795	0.0325444	56.6505	0.0552923	0.000479915	0.750967	4.52957	0.0570097
		K12-85.3L-AW_6	85.3	42.7104	1.75969	0.0161682	536.844	0.269597	0.0344817	82.2481	0.175548	0.00122557	0.719142	24.8184	0.294567
		K12-85.3L-AW_7	85.3	53.1429	4.19433	0.0417309	636.069	0.446884	0.0739261	67.7699	0.164311	0.00148369	0.770459	9.20409	0.125129
		K12-85.3L-AW_8	85.3	71.3561	9.9016	0.0893714	706.083	1.05666	0.0795088	75.3506	0.323467	0.00235649	0.825979	7.15995	0.0811621
		K12-85.3L-AW_12	85.3	58.9213	4.89622	0.0506072	572.909	0.476733	0.0607206	55.7828	0.101262	0.000752323	0.79155	4.7412	0.0595821
	Horn Granodiorite	K12-90.4R-3	90.4	58.9118	12.0605	0.082897	1282.52	1.49142	0.453538	158.598	0.426779	0.00302231	0.791394	8.06269	0.102594
		K12-90.4R-4	90.4	72.8777	23.5799	0.16816	1235.31	0.627011	0.139578	32.8481	0.961882	0.00637768	0.829904	9.06521	0.0872165
		K12-90.4R-5	90.4	46.2449	11.9539	0.0815134	2113.23	0.430711	0.0783469	76.1418	0.327171	0.00232113	0.739497	6.81223	0.0664377
		K12-90.4R-6	90.4	67.7115	20.9104	0.165153	1443.63	2.03031	0.524976	140.17	0.480612	0.00305995	0.817145	5.10418	0.0577375
		K12-90.4R-7	90.4	42.8517	6.86842	0.0484364	1403.94	0.561219	0.176682	114.716	0.624323	0.00387407	0.720561	22.9474	0.247056
	Tuna Diorite	K12-99R2-1	99	43.0757	0.85735	0.00552476	217.765	0.552271	0.0950227	140.276	0.252509	0.0022421	0.718335	65.7765	1.59803
		K12-99R2-2	99	34.2579	0.699883	0.00462575	345.162	0.62313	0.0856479	307.309	0.23576	0.00127941	0.652252	78.8366	1.89596
		K12-99R2-4	99	49.6959	2.42183	0.0177787	438.745	1.73296	0.152437	313.947	1.5013	0.00325997	0.753551	129.515	1.81867
		K12-99R2-5	99	44.8647	0.756047	0.00547968	188.448	0.502028	0.111377	125.133	1.04901	0.00433926	0.732397	298.279	9.13347
		K12-99R2-6	99	43.0785	0.475288	0.00325315	114.305	0.0862427	0.0377923	20.7411	0.363776	0.00228621	0.723997	185.919	3.66604
		K12-99R2-7	99	38.7106	1.19699	0.00843726	532.838	0.577584	0.0708834	257.11	1.6667	0.00623784	0.695785	326.848	4.69247
	Elves Granodiorite
		K12-115L-3	115	74.4519	10.1123	0.14698	531.752	3.16247	0.0451155	166.297	2.54055	0.0202273	0.83235	51.9798	0.800141
		K12-115L-4	115	59.8567	2.69062	0.0390788	228.652	0.888191	0.0127092	75.4797	1.07175	0.00689123	0.794327	85.8384	1.25815
		K12-115L-5	115	48.831	1.82641	0.0264527	328.527	0.615009	0.00874387	110.625	0.564724	0.00363721	0.751048	70.4641	1.0291
		K12-115L-8	115	49.1299	4.50814	0.0650901	668.45	0.888042	0.0126571	131.676	1.09302	0.00763295	0.753234	56.8872	0.860624
Central	Granophyre	K12-132L-2	132	51.6807	2.85243	0.0411491	366.428	4.28407	0.0608842	550.339	1.6337	0.00797984	0.758001	102.814	1.24477
		K12-132L-3	132	61.1635	0.688883	0.00995296	77.318	1.15115	0.0164872	129.201	2.32	0.00849805	0.798198	542.691	6.46184
		K12-132L-4	132	53.3166	1.14033	0.0165774	171.93	1.14721	0.0163595	172.967	2.16097	0.00694432	0.770967	360.164	4.50175
		K12-132L-8	132	58.6703	1.34314	0.0195769	155.956	1.86059	0.0264567	216.038	3.5098	0.0128202	0.790072	449.473	5.48536
		K12-132L-9	132	75.2663	5.98456	0.0864207	313.501	7.01439	0.0999557	367.449	1.39524	0.00871371	0.830395	40.6767	0.528957
Western	Granite dike
		K12-236-6-1	236	31.8835	1.09282	0.0158694	594.107	0.482983	0.00688636	262.571	0.0421771	0.000525706	0.631944	10.259	0.183668
		K12-236-6-2	236	47.5339	4.06299	0.0584965	786.592	2.00957	0.0287009	389.052	0.415872	0.00317154	0.742911	22.8639	0.336632
		K12-236-6-7	236	54.6368	2.49905	0.0360217	387.447	1.3592	0.0194416	210.727	0.539255	0.00155068	0.774066	45.7094	0.586624
		K12-236-6-8	236	54.0383	0.902498	0.0130212	119.654	0.402464	0.00575176	53.359	0.420541	0.00213481	0.773158	100.524	1.38581

## Sheet: TABLE S2
TABLE S2: CONSTAINTS FOR THE EASTERN GRAND CANYON
Constraint Boxes	Time (Ma)	Temperature (℃)	Method	Publication	Associated Geologic Event
a	1770-1700	800-700	metamorphic P-T paths	Dumond et al., 2007	Pluton emplacement & peak metamorphism
b	1690-1530	550-500	Ar/Ar hornblende	Dumond et al., 2007	decompression and post-orogenic cooling
c	1500-1400	375-325	Ar/Ar muscovite	Karlstrom et al., 2003	Cooling through muscovite Ar/Ar closure
d	1450-1300	325-275	Ar/Ar biotite	Timmons et al., 2005	Picuris orogeny variable cooling / reheating
e	1350-1300	300-250	Ar/Ar Kspar MDD modeling	Timmons et al., 2005	cooling following Picuris orogeny
f	1260-1240	50-20	U-Pb zircon on Bass ash	Timmons et al., 2005	deposition of Bass and Hakatai Fms
g	1230-1100	200-100	Ar/Ar and U-Pb dates on Cardenas basalt	Mulder et al., 2017	Deposition of >2 Ma Unkar Group and possible 1.1 Ga heating
h	775-729	150-20		Karlstrom and Timmons, 2012	deposition of >2-km-thick Chuar Group on top of 2 km of Unkar Group
i	729-630	250-50		Karlstrom and Timmons, 2012	possible (not documented) additional Chuar Group and/or Snowball Earth deposits
j	530-380	120-20		Karlstrom et al., 2020a	Deposition of Tonto Group and possible (not documented) additional Cambrian to Devonian strata
k	340-100	250-20		Blakey and Middleton, 2012	Deposition of 2-4 km of Late Paleozoic to Cretaceous strata
l	90-70	200-50	AHe, AFT	Flower et al., 2008; Flowers and Farley, 2012; Karlstrom et al., 2014; Winn et al., 2017	Maximum burial prior to Laramide orogeny
m	30-10	0			surface conditions today

## Sheet: TABLE S3
TABLE S3. INPUTS, SETTINGS, AND BOUNDARY CONDITIONS FOR THERMAL HISTORY MODEL SIMULATIONS.
1. Thermochronologic data
samples and data used in inverse models
ZHe data
K12-79.6-AW	X
K12-85.3L-AW	X
K12-90-4R	X
K12-99R2	X
K12-115L
K12-132L
K12-236-6
Data Treatment, Uncertainties, Other Relevant Constraints
ZHe data
Treatment:	One synthetic low, moderate, and high eU grain were used as a separate constraint in each inverse model.
	Low: <400 ppm eU
	Moderate: 400-750 ppm eU
	High: >750 ppm eU
eU (ppm):	Mean intrasample eU for each eU bin.
eU zonation:	None. Zoning too variable to choose a representative eU profile.
He dates (Ma):	Mean intrasample uncorrected date for each eU bin.
Error (Ma) applied in modeling:	The 1σ standard deviation of the intrasample mean
r (µm):	Mean intrasample equivalent spherical radius for each eU bin.
2. Crystallization age constraints
Sample and Geologic Unit			Age (Ga)	data source			Latitude	Longitude
K12-79.6-AW			1.751	Hawkins et al., 1996			36.0504	-111.969
K12-85.3L	Zoroaster Granite		1.74	Hawkins et al., 1996			36.0892	-112.06
K12-90-4R	Horn Granodiorite		1.713	Hawkins et al., 1996			36.102	-112.137
K12-99R2	Tuna Diorite		1.73	Hawkins et al., 1996			36.1447	-112.255
K12-115L	Elves Chasm Granodiorite		1.84	Hawkins et al., 1996			36.2037	-112.426
K12-132L	Diabase		1.1	Karlstrom, unpublished			36.3478	-112.456
K12-236-6 g	Granite dike		1.68	Bowring, unpublished			35.7898	-113.537
3. System and model specific parameters
Inverse models
He kinetic model: ZRDAAM (Guenthner et al., 2013)
Statistical fitting criteria: Bayesian MCMC
Modeling code: QTQt 5.5.0
Model inputs: Zircon (U-Th)/He dates and eU
Model outputs: time-Temperature paths coded by probabilty
Burn-in/Burn-out: 500,000 each
Inverse models
He kinetic model: ZRDAAM (Guenthner et al., 2013)
Statistical fitting criteria: GOF value ≥ 0.5, good. GOF 0.5 ≤ 0.05, acceptable.
Modeling code: HeFTy v. 1.9.3.
Model inputs: Synthetic zircon eU and equivalent spherical radius (as a proxy for grain size) based on intrasample eU bins. Synthetic apatite eU from Lee et al., 2013. Synthetic apatite fission track data from Kelley et al., 2001.
Model outputs: Good and acceptable tT paths and path envelopes.
Number of tT paths: 200,000
Forward models
He kinetic model: ZRDAAM (Guenthner et al., 2013)
Modeling code: ZRDAAM applied in MATLAB
Model inputs: simplified time-temperature paths
Model outputs: synthetic zircon He dates for a range of eU with intrasample mean ± 2σ equivalent spherical radius
Number of tT paths: 2-4 depending on thermal event targeted by model
tT path characteristics: Simplified t-T paths made to target specific known thermal events

## Sheet: G48699
Thurston, O.G., et al., 2021, Zircon (U-Th)/He thermochronology of Grand Canyon resolves 1250 Ma unroofing at the Great Unconformity and <20 Ma canyon carving: Geology, https://doi.org/10.1130/G48699.1
